# Supplementary material
Source: ML conference proceedings conference paper supplement (https://proceedings.mlr.press/v119/guo20d.html)
Supplement: Supplementary file [file guo20d-supp.pdf]

# Supplementary Materials for “LTF: A Label Transformation Framework for Correcting Label Shift”

Anonymous Authors<sup>1</sup>

## A. Supplementary Material

### A.1. Proof of Proposition 1

*Proof.* Let  $h^c$  be complementary function of  $h$ , such that  $X = H(h(X), h^c(X))$ . Let  $X_1 = h(X)$  and  $X_2 = h^c(X)$ , then we have  $p_{X,Y}(x, y) = p_{X_1, X_2, Y}(x_1, x_2, y)$ . Using the decomposition  $p_{X_1, X_2, Y}(x_1, x_2, y) = p_{X_1}(x_1)p_{X_2, Y|X_1}(x_2, y|x_1)$ , we have

$$I(Y, X) = I(Y, X_1) + E_{X_1}[I(Y|X_1, X_2|X_1)], \quad (1)$$

where  $I(\cdot, \cdot) \geq 0$  is the mutual information. By maximizing  $I(Y, X_1)$ , the best solution we can achieve is  $I(Y, X_1) = I(Y, X)$ , which implies  $I(Y|X_1, X_2|X_1) = 0$ . This means the conditional independence of  $Y$  and  $X_2$  given  $X_1$ , i.e.,  $Y \perp\!\!\!\perp X_2|X_1$ , which is equivalent to  $Y \perp\!\!\!\perp X|h(X)$ . Then it suffices to show that maximizing mutual information  $I(Y, X_1)$  is equivalent to minimizing the cross-entropy loss or mean squared loss under some parametric assumptions.

We first expand the mutual information  $I(Y, X_1)$  as

$$\begin{aligned} I(Y, X_1) &= H(Y) - H(Y|X_1) \\ &= H(Y) + \int p(y, x_1) \log p(y|x_1) dy dx_1. \end{aligned} \quad (2)$$

For regression problems, we use  $q(y|x_1) = N(w^T x_1 | \sigma^2)$  to approximate  $p(y|x_1)$  and write (2) as

$$I(Y, X_1) \approx H(Y) - \frac{1}{2\sigma^2} \int p(y, x_1) (y - w^T x_1)^2 dy dx_1. \quad (3)$$

It is straightforward to see that maximizing  $I(Y, X_1)$  is equivalent minimizing the mean squared loss. For classification, we use  $q(y = k|x_1) = \frac{\exp w_k^T x_1}{\sum_{k'=1}^K \exp w_{k'}^T x_1}$  to approximate  $p(y|x_1)$  and rewrite (2) as

$$I(Y, X_1) \approx H(Y) + \int \sum_{k=1}^K p(y = k, x_1) \frac{\exp w_k^T x_1}{\sum_{k'=1}^K \exp w_{k'}^T x_1} dx_1 \quad (4)$$

<sup>1</sup>Anonymous Institution, Anonymous City, Anonymous Region, Anonymous Country. Correspondence to: Anonymous Author <anon.email@domain.com>.

Therefore, maximizing  $I(Y, X_1)$  is equivalent minimizing the cross-entropy loss for classification.  $\square$

### A.2. Results of Fashion-MNIST and MNIST

#### A.2.1. RESULTS OF CIFAR-10

The details of experimental settings of CIFAR-10 are given at the table 1, and the results of CIFAR-10 are given at the main paper.

| Classifier Details               |                             |
|----------------------------------|-----------------------------|
| Architecture                     | Resnet-18                   |
| Batch Size                       | 128                         |
| Training epochs                  | 20                          |
| Optimizer                        | SGD                         |
| Learning Rate                    | 1e-2                        |
| L2 Penalty Parameter             | 5e-4                        |
| Label Transformation Details     |                             |
| Architecture                     | One-Layer Network           |
| Label Influence Recovery Details |                             |
| Generator Architecture           | BigGAN                      |
| Training Method                  | BigGAN (Brock et al., 2018) |
| Distribution Matching            |                             |
| Optimizer                        | Adam                        |
| Learning Rate                    | 8e-5                        |
| Training epochs                  | 1000                        |

Table 1. The experimental details on CIFAR-10 dataset.

#### A.2.2. RESULTS OF FASHION-MNIST

The details of experimental settings of Fashion-MNIST are given at the table 2. The MSE error of the estimated label weights  $P_Y^T/P_Y^S$ , accuracy and F1 score of FASHION-MNIST are shown as Figure 1, 2, 3.

#### A.2.3. RESULTS OF MNIST

The details of experimental settings of MNIST are given at the table 3. The MSE error of the estimated label weights  $P_Y^T/P_Y^S$ , accuracy and F1 score of MNIST are shown as Figure 4, 5, 6.

| Classifier Details               |                             |
|----------------------------------|-----------------------------|
| Architecture                     | Discriminator of DCGAN      |
| Batch Size                       | 128                         |
| Training epochs                  | 20                          |
| Optimizer                        | SGD                         |
| Learning Rate                    | 1e-2                        |
| L2 Penalty Parameter             | 5e-4                        |
| Label Transformation Details     |                             |
| Architecture                     | One-Layer Network           |
| Label Influence Recovery Details |                             |
| Generator Architecture           | Generator of DCGAN          |
| Training Method                  | TAC-GAN (Gong et al., 2019) |
| Distribution Matching            |                             |
| Optimizer                        | Adam                        |
| Learning Rate                    | 8e-5                        |
| Training epochs                  | 1000                        |

Table 2. The experimental details on FASHION-MNIST dataset.

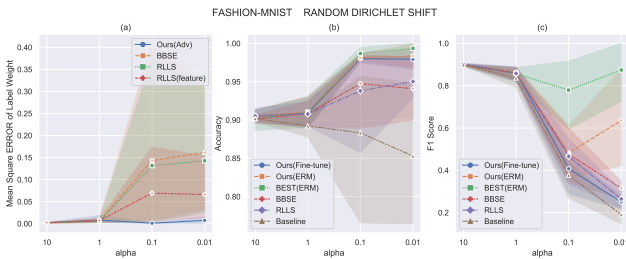

Figure 1. (a) Mean squared errors of estimated label weights (Lower is better), (b) accuracy and (c) F-1 score (Higher is better) on FASHION-MNIST for the uniform training set and random Dirichlet shifted test set, where the smaller  $\alpha$  corresponds to the bigger shift.

| Classifier Details               |                             |
|----------------------------------|-----------------------------|
| Architecture                     | Two-layer Network           |
| Batch Size                       | 128                         |
| Training epochs                  | 20                          |
| Optimizer                        | SGD                         |
| Learning Rate                    | 1e-2                        |
| L2 Penalty Parameter             | 5e-4                        |
| Label Transformation Details     |                             |
| Architecture                     | One-Layer Network           |
| Label Influence Recovery Details |                             |
| Generator Architecture           | Four-layer Network          |
| Training Method                  | TAC-GAN (Gong et al., 2019) |
| Distribution Matching            |                             |
| Optimizer                        | Adam                        |
| Learning Rate                    | 8e-5                        |
| Training epochs                  | 1000                        |

Table 3. The experimental details on MNIST dataset.

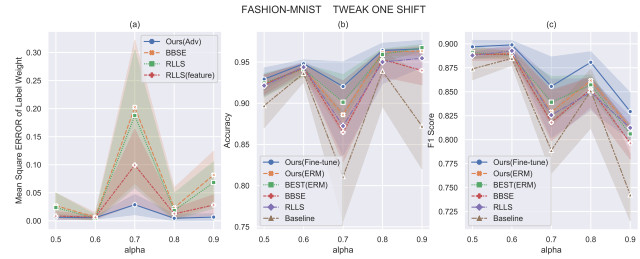

Figure 2. (a) Mean squared errors of estimated label weights (Lower is better), (b) accuracy and (c) F-1 score (Higher is better) on FASHION-MNIST for the uniform training set and Tweak-One shifted test set, where  $\alpha$  is the probability of the tweaked class.

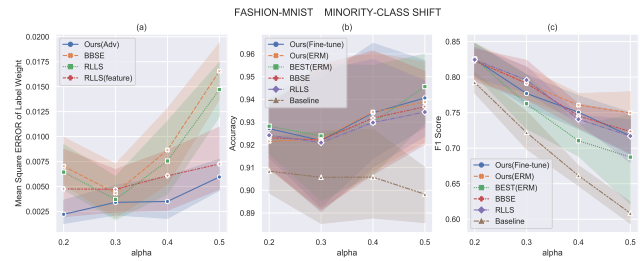

Figure 3. (a) Mean squared errors of estimated label weights (Lower is better), (b) accuracy and (c) F-1 score (Higher is better) on FASHION-MNIST for the uniform training set and minority-class shifted test set, where  $\alpha$  is the ratio of minority classes.

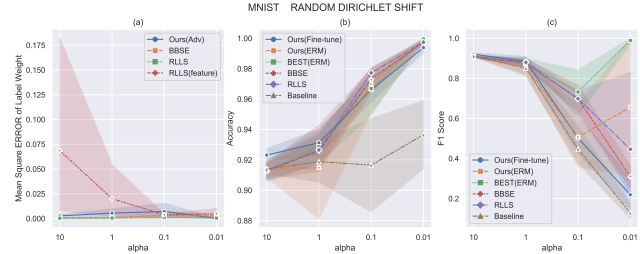

Figure 4. (a) Mean squared errors of estimated label weights (Lower is better), (b) accuracy and (c) F-1 score (Higher is better) on MNIST for the uniform training set and the random Dirichlet shifted test set, where the smaller  $\alpha$  corresponds to the bigger shift.

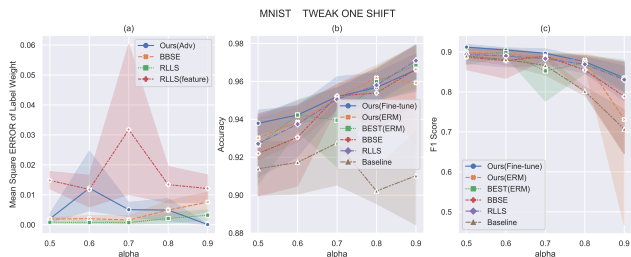

Figure 5. (a) Mean squared errors of estimated label weights (Lower is better), (b) accuracy and (c) F-1 score (Higher is better) on MNIST for the uniform training set and Tweak-One shifted test set, where  $\alpha$  is the probability of the tweaked class.

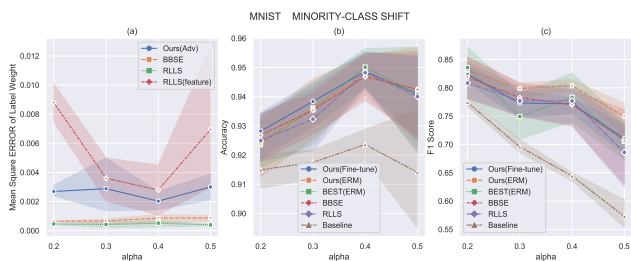

Figure 6. (a) Mean squared errors of estimated label weights (Lower is better), (b) accuracy and (c) F-1 score on MNIST for the uniform training set and minority-class shifted test set, where  $\alpha$  is the ratio of minority classes.

### A.3. Label Weights Visualization of Continuous Synthetic Data Experiments

| Regressor Details                |                             |
|----------------------------------|-----------------------------|
| Architecture                     | Three-layer Network         |
| Batch Size                       | 64                          |
| Training epochs                  | 1000                        |
| Optimizer                        | Adam                        |
| Learning Rate                    | 1e-3                        |
| Label Transformation Details     |                             |
| Architecture                     | Three-layer Network         |
| Label Influence Recovery Details |                             |
| Generator Architecture           | Three-layer Network         |
| Training Method                  | TAC-GAN (Gong et al., 2019) |
| Distribution Matching            |                             |
| Optimizer                        | Adam                        |
| Learning Rate                    | 1e-3                        |
| Training epochs                  | 10000                       |

Table 4. The experimental details on Moon Synthetic dataset.

### A.3.1. RESULTS OF SHIFT A

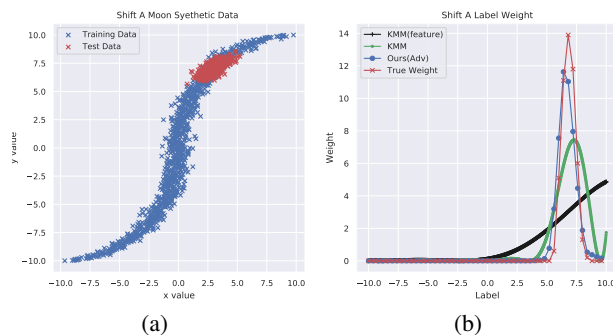

Figure 7. (a) The illustration of Moon Synthetic Data (Shift A, 1st experiment), (b) The visualization of label weight  $P_Y^T/P_Y^S$  of KMM, KMM(feature), our framework and the Ground Truth.

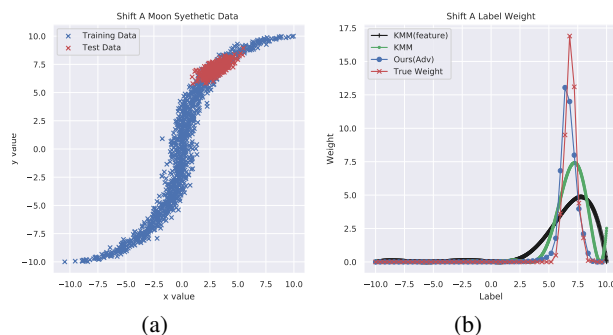

Figure 8. (a) The illustration of Moon Synthetic Data (Shift A, 2nd experiment), (b) The visualization of label weight  $P_Y^T/P_Y^S$  of KMM, KMM(feature), our framework and the Ground Truth.

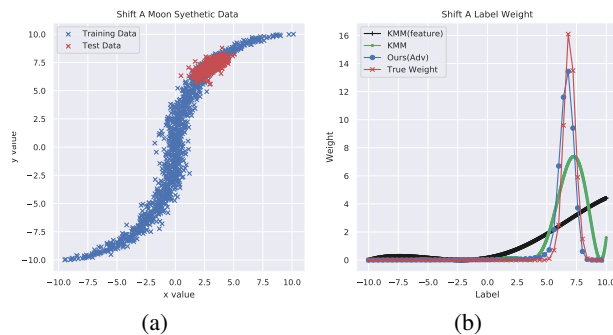

Figure 9. (a) The illustration of Moon Synthetic Data (Shift A, 3rd experiment), (b) The visualization of label weight  $P_Y^T/P_Y^S$  of KMM, KMM(feature), our framework and the Ground Truth.

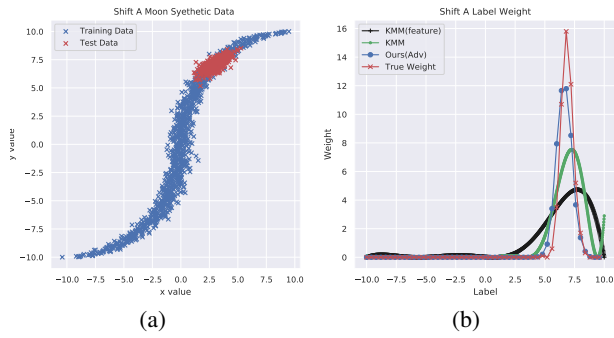

Figure 10. (a) The illustration of Moon Synthetic Data (Shift A, 4th experiment), (b) The visualization of label weight  $P_Y^T/P_Y^S$  of KMM, KMM(feature), our framework and the Ground Truth.

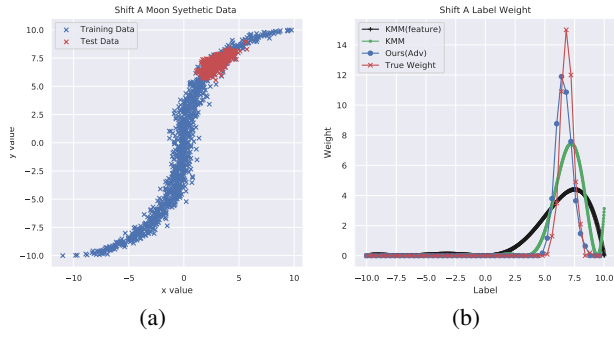

Figure 11. (a) The illustration of Moon Synthetic Data (Shift A, 5th experiment), (b) The visualization of label weight  $P_Y^T/P_Y^S$  of KMM, KMM(feature), our framework and the Ground Truth.

### A.3.2. RESULTS OF SHIFT B

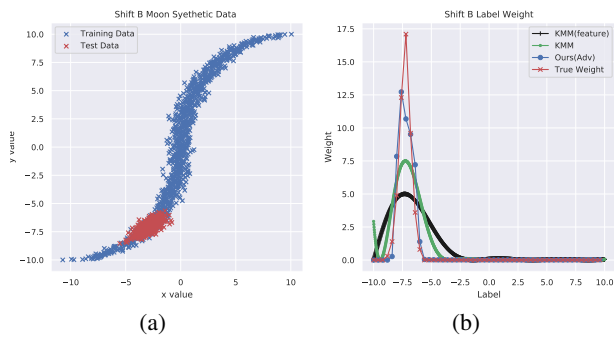

Figure 12. (a) The illustration of Moon Synthetic Data (Shift B, 1st experiment), (b) The visualization of label weight  $P_Y^T/P_Y^S$  of KMM, KMM(feature), our framework and the Ground Truth.

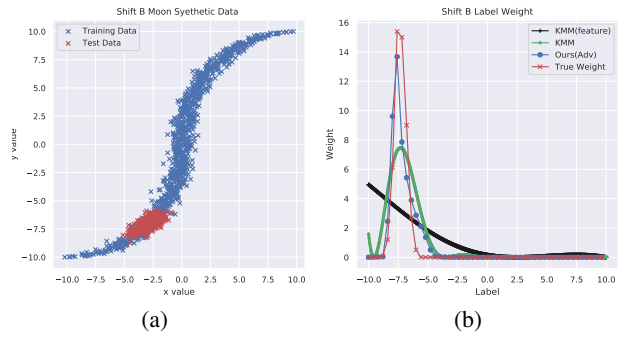

Figure 13. (a) The illustration of Moon Synthetic Data (Shift B, 2nd experiment), (b) The visualization of label weight  $P_Y^T/P_Y^S$  of KMM, KMM(feature), our framework and the Ground Truth.

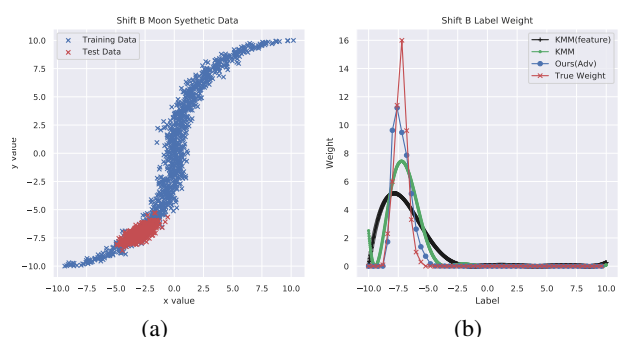

Figure 14. (a) The illustration of Moon Synthetic Data (Shift B, 3rd experiment), (b) The visualization of label weight  $P_Y^T/P_Y^S$  of KMM, KMM(feature), our framework and the Ground Truth.

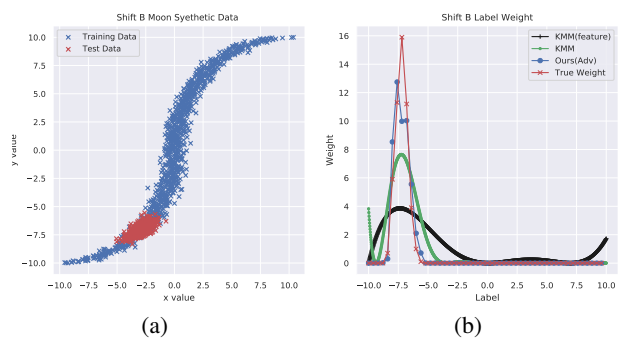

Figure 15. (a) The illustration of Moon Synthetic Data (Shift B, 4th experiment), (b) The visualization of label weight  $P_Y^T/P_Y^S$  of KMM, KMM(feature), our framework and the Ground Truth.

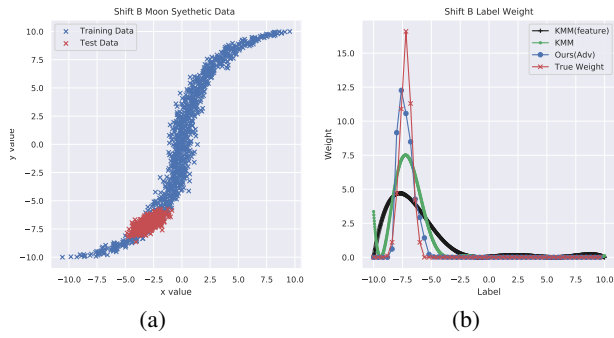

Figure 16. (a) The illustration of Moon Synthetic Data (Shift B, 5th experiment), (b) The visualization of label weight  $P_Y^T/P_Y^S$  of KMM, KMM(feature), our framework and the Ground Truth.

A.3.3. RESULTS OF SHIFT C

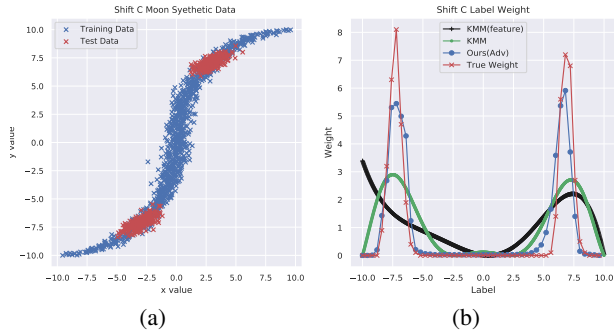

Figure 17. (a) The illustration of Moon Synthetic Data (Shift C, 1st experiment), (b) The visualization of label weight  $P_Y^T/P_Y^S$  of KMM, KMM(feature), our framework and the Ground Truth.

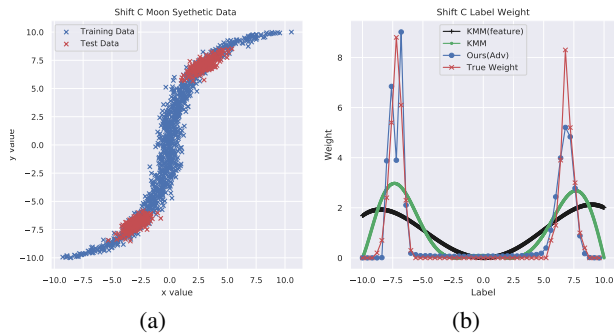

Figure 18. (a) The illustration of Moon Synthetic Data (Shift C, 2nd experiment), (b) The visualization of label weight  $P_Y^T/P_Y^S$  of KMM, KMM(feature), our framework and the Ground Truth.

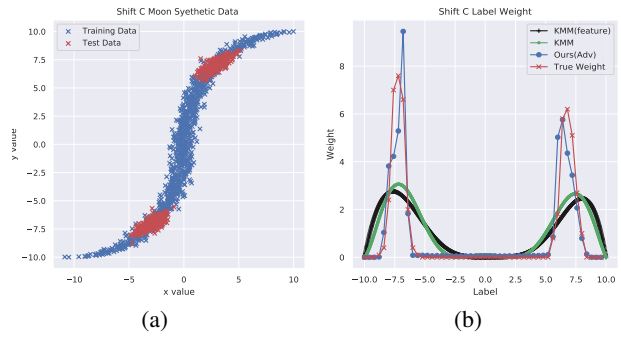

Figure 19. (a) The illustration of Moon Synthetic Data (Shift C, 3rd experiment), (b) The visualization of label weight  $P_Y^T/P_Y^S$  of KMM, KMM(feature), our framework and the Ground Truth.

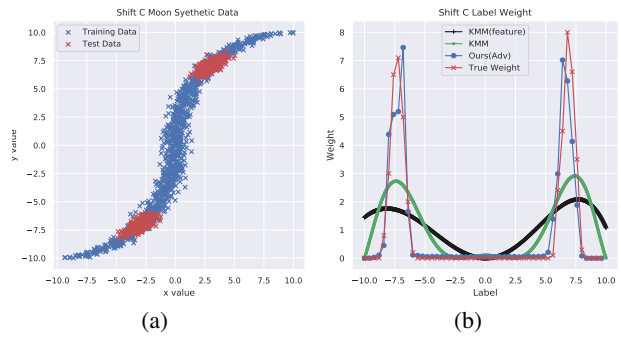

Figure 20. (a) The illustration of Moon Synthetic Data (Shift C, 4th experiment), (b) The visualization of label weight  $P_Y^T/P_Y^S$  of KMM, KMM(feature), our framework and the Ground Truth.

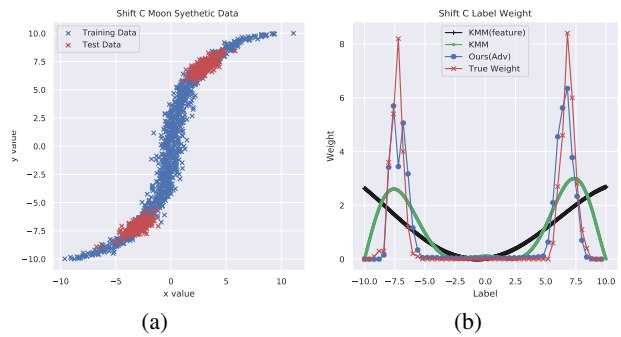

Figure 21. (a) The illustration of Moon Synthetic Data (Shift C, 5th experiment), (b) The visualization of label weight  $P_Y^T/P_Y^S$  of KMM, KMM(feature), our framework and the Ground Truth.



A.3.4. RESULTS OF SHIFT D

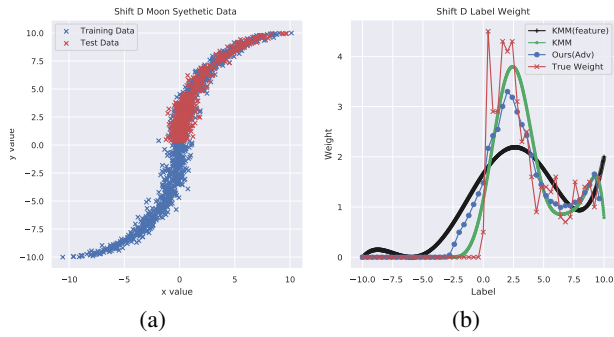

Figure 22. (a) The illustration of Moon Synthetic Data (Shift D, 1st experiment), (b) The visualization of label weight  $P_Y^T/P_Y^S$  of KMM, KMM(feature), our framework and the Ground Truth.

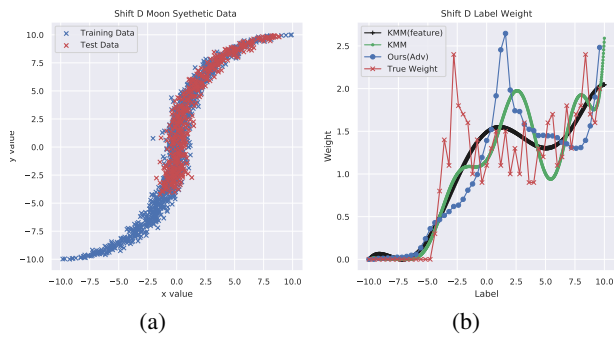

Figure 23. (a) The illustration of Moon Synthetic Data (Shift D, 2nd experiment), (b) The visualization of label weight  $P_Y^T/P_Y^S$  of KMM, KMM(feature), our framework and the Ground Truth.

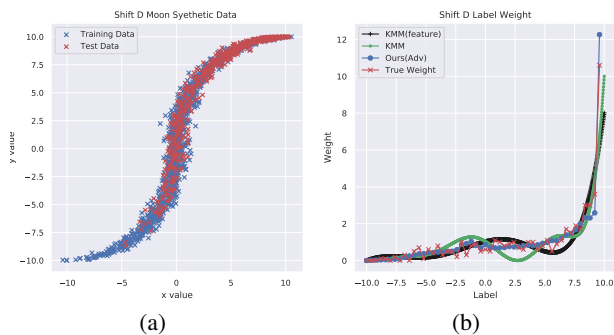

Figure 24. (a) The illustration of Moon Synthetic Data (Shift D, 3rd experiment), (b) The visualization of label weight  $P_Y^T/P_Y^S$  of KMM, KMM(feature), our framework and the Ground Truth.

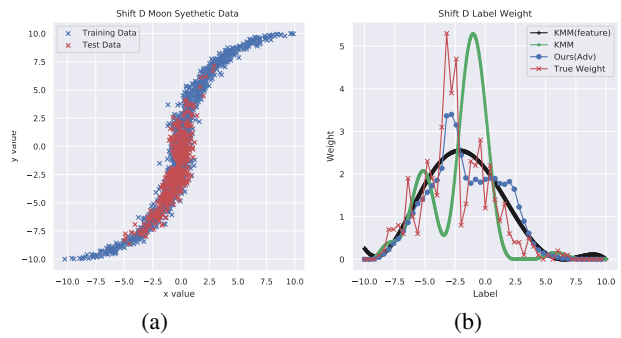

Figure 25. (a) The illustration of Moon Synthetic Data (Shift D, 4th experiment), (b) The visualization of label weight  $P_Y^T/P_Y^S$  of KMM, KMM(feature), our framework and the Ground Truth.

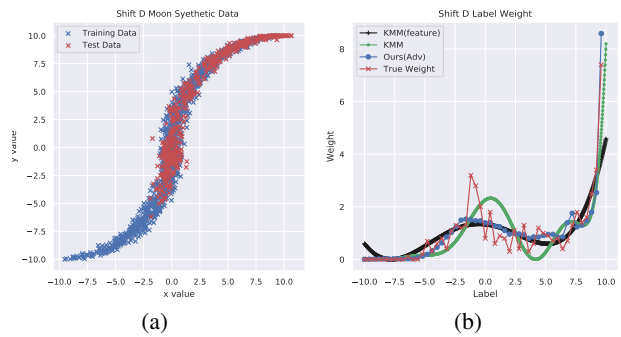

Figure 26. (a) The illustration of Moon Synthetic Data (Shift D, 5th experiment), (b) The visualization of label weight  $P_Y^T/P_Y^S$  of KMM, KMM(feature), our framework and the Ground Truth.

A.4. Results of dsprite Dataset

The details of experimental settings of dsprite could be found at the table 5. The results of it could be found at the main paper.

| Regressor Details                |                             |
|----------------------------------|-----------------------------|
| Architecture                     | Discriminator of DCGAN      |
| Batch Size                       | 128                         |
| Training epochs                  | 500                         |
| Optimizer                        | Adam                        |
| Learning Rate                    | 1e-4                        |
| Label Transformation Details     |                             |
| Architecture                     | Three-Layer Network         |
| Label Influence Recovery Details |                             |
| Generator Architecture           | Generator of DCGAN          |
| Training Method                  | TAC-GAN (Gong et al., 2019) |
| Distribution Matching            |                             |
| Optimizer                        | Adam                        |
| Learning Rate                    | 5e-5                        |
| Training epochs                  | 2000                        |

Table 5. The experimental details on dsprite dataset.

330 **References**

331 Andrew Brock, Jeff Donahue, and Karen Simonyan. Large  
332 scale gan training for high fidelity natural image synthesis.  
333 *arXiv preprint arXiv:1809.11096*, 2018.  
334

335 Mingming Gong, Yanwu Xu, Chunyuan Li, Kun Zhang, and  
336 Kayhan Batmanghelich. Twin auxiliary classifiers gan.  
337 *arXiv preprint arXiv:1907.02690*, 2019.  
338

339  
340  
341  
342  
343  
344  
345  
346  
347  
348  
349  
350  
351  
352  
353  
354  
355  
356  
357  
358  
359  
360  
361  
362  
363  
364  
365  
366  
367  
368  
369  
370  
371  
372  
373  
374  
375  
376  
377  
378  
379  
380  
381  
382  
383  
384
